# Supplementary material for: DFT Simulation-Based Design of 1T-MoS2 Cathode Hosts for Li-S Batteries and Experimental Evaluation
Source: MDPI journal article supplement (doi:10.3390/ijms232415608), 2022-12-09
Supplement: s1 [file s1]

## Supporting Information

# DFT Simulation-Based Design of 1T-MoS<sub>2</sub> Cathode Hosts for Li-S Batteries and Experimental Evaluation

Elaheh Hojaji <sup>1,2</sup>, Eleftherios I. Andritsos <sup>1,2</sup>, Zhuangnan Li <sup>3</sup>, Manish Chhowalla <sup>3</sup>,  
Constantina Lekakou <sup>1,\*</sup> and Qiong Cai <sup>2,\*</sup>

<sup>1</sup> Department of Mechanical Engineering Sciences, Faculty of Engineering and Physical Sciences, University of Surrey, Guildford GU2 7XH, UK

<sup>2</sup> Department of Chemical and Process Engineering, Faculty of Engineering and Physical Sciences, University of Surrey, Guildford GU2 7XH, UK

<sup>3</sup> Department of Materials Science and Metallurgy, University of Cambridge, Cambridge CB3 0FS, UK

\* Correspondence: c.lekakou@surrey.ac.uk (C.L.); q.cai@surrey.ac.uk (Q.C.)

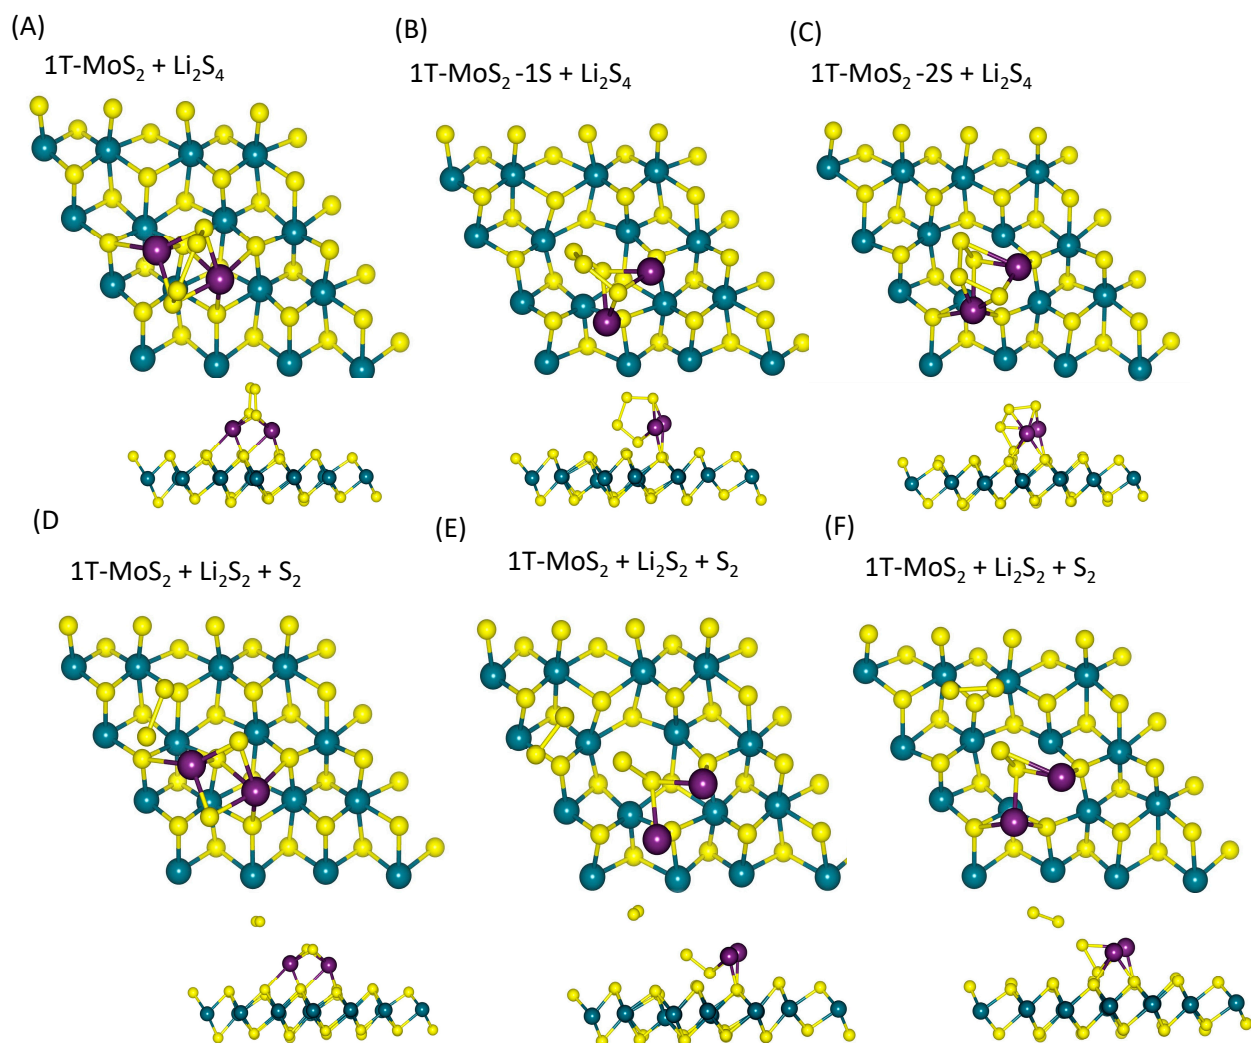

Figure S1. Top views and side views of the optimised geometry of adsorbed  $\text{Li}_2\text{S}_4$  on (A)  $1\text{T-MoS}_2$ , (B)  $1\text{T-MoS}_2\text{-1S}$ , (C)  $1\text{T-MoS}_2\text{-2S}$ ; (D), (E), (F) its dissociated products on  $1\text{T-MoS}_2$ ,  $1\text{T-MoS}_2\text{-1S}$ ,  $1\text{T-MoS}_2\text{-2S}$ , respectively for the reaction pathway of  $\text{Li}_2\text{S}_4 \rightarrow \text{Li}_2\text{S}_2 + \text{S}_2$ . The S-S bond length was less than 5 Å.

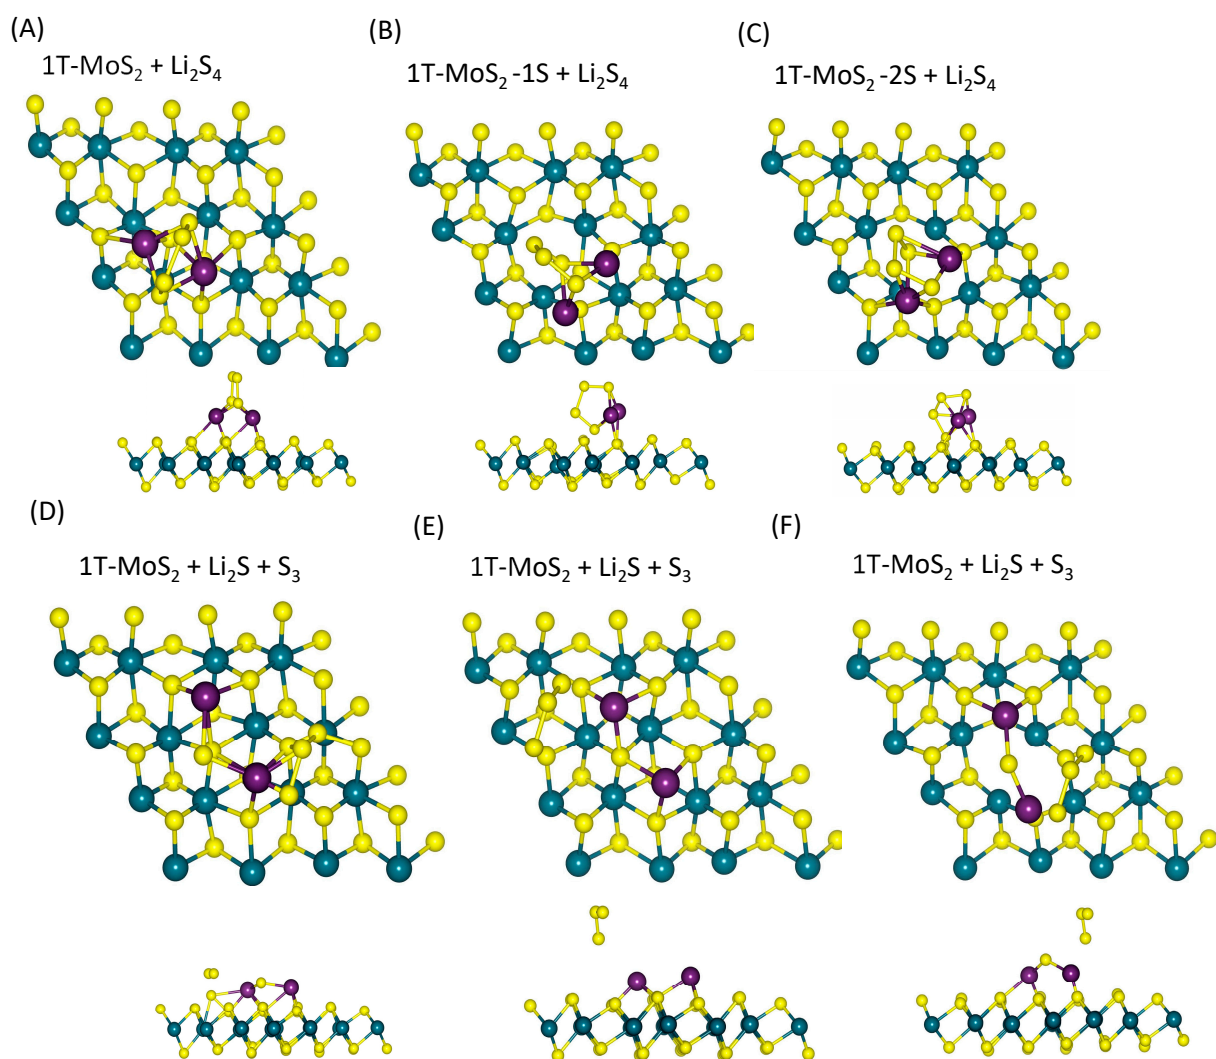

Figure S2. Top views and side views of the optimised geometry of adsorbed  $\text{Li}_2\text{S}_4$  on (A)  $1\text{T-MoS}_2$ , (B)  $1\text{T-MoS}_2-1\text{S}$ , (C)  $1\text{T-MoS}_2-2\text{S}$ ; (D), (E), (F) its dissociated products on  $1\text{T-MoS}_2$ ,  $1\text{T-MoS}_2-1\text{S}$ ,  $1\text{T-MoS}_2-2\text{S}$ , respectively for the reaction pathway of  $\text{Li}_2\text{S}_4 \rightarrow \text{Li}_2\text{S} + \text{S}_3$ . The S-S bond length was less than 5 Å.
